# Supplementary material for: SENP3 maintains the stability and function of regulatory T cells via BACH2 deSUMOylation
Source: PubMed Central journal article supplement (PMC6082899; doi:10.1038/s41467-018-05676-6), 2018-08-08
Supplement: 41467_2018_5676_MOESM1_ESM.pdf [file 41467_2018_5676_MOESM1_ESM.pdf]

# **SENP3 maintains the stability and function of regulatory T cells via BACH2 deSUMOylation**

Yu et al.



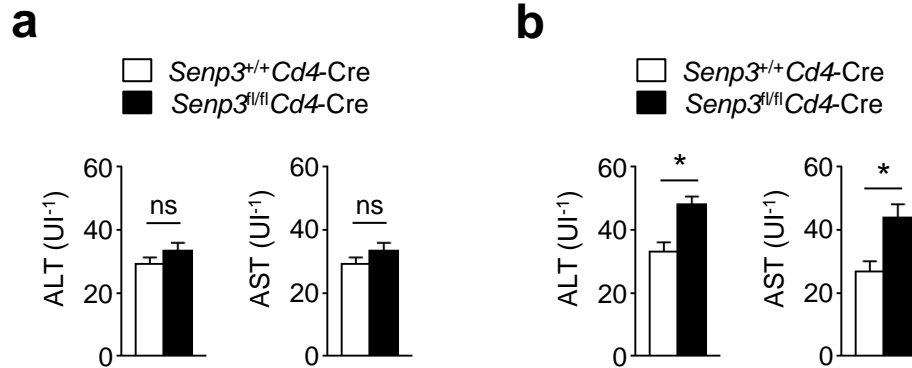

**Supplementary Figure 2. Serum AST and ALT concentrations of the *Senp3*<sup>fl/fl</sup>*Cd4-Cre* mice.** (a) Serum AST and ALT concentrations of 8-week-old *Senp3*<sup>+/+</sup>*Cd4-Cre* and *Senp3*<sup>fl/fl</sup>*Cd4-Cre* mice. (b) Serum AST and ALT concentrations of 8-month-old *Senp3*<sup>+/+</sup>*Cd4-Cre* and *Senp3*<sup>fl/fl</sup>*Cd4-Cre* mice. Data are representative of at least three independent experiments. Error bars are the mean  $\pm$  SEM values. n = 5. Two-tailed unpaired Student's *t* tests were performed. ns, not statistically significant. \*, P<0.05.

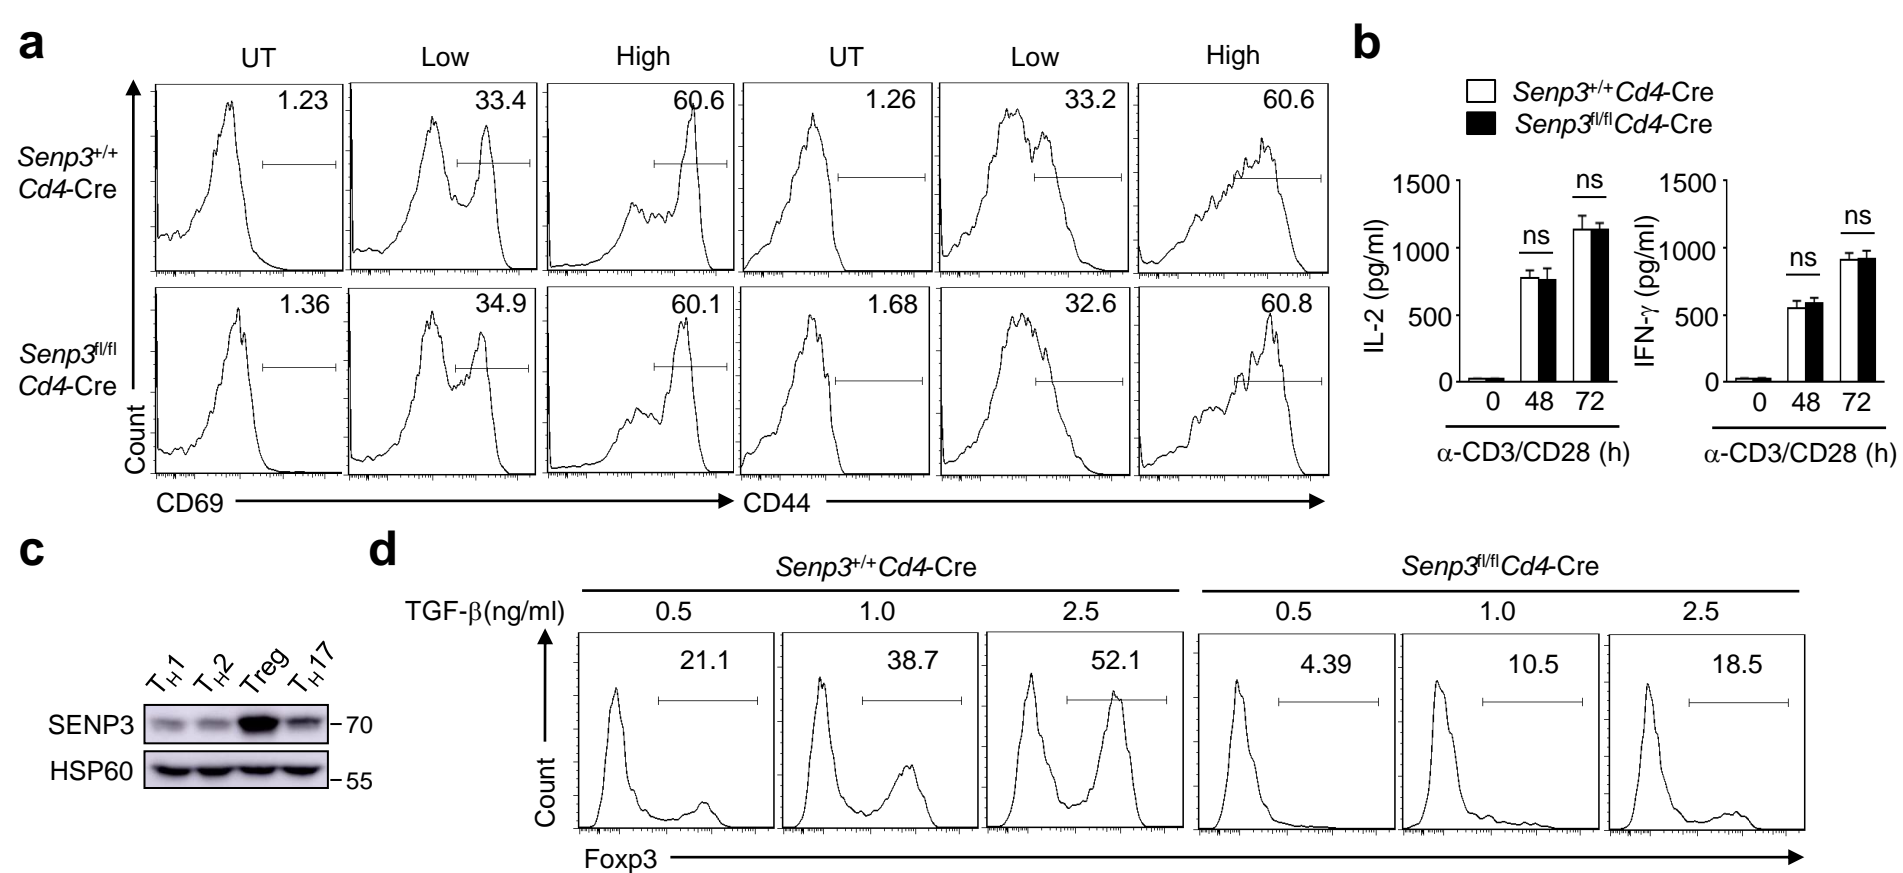

**Supplementary Figure 3. T cell activation and Treg cell differentiation of naive *Senp3<sup>fl/fl</sup>Cd4-Cre* CD4<sup>+</sup> T cells.** (a) Flow cytometric analysis of CD69 and CD44 in naive CD4<sup>+</sup> T cells stimulated for 24 h with the different doses of anti-CD3 and anti-CD28. UT, unstimulated; Low, 0.25  $\mu$ g/ml anti-CD3 and anti-CD28; High, 1.0  $\mu$ g/ml anti-CD3 and anti-CD28. (b) ELISA of secreted IL-2 and IFN- $\gamma$  of naive CD4<sup>+</sup> T cells either not treated (0) or stimulated for indicated amounts of time. (c) Immunoblot analysis of SENP3 in various T cell subsets that were differentiated *in vitro*. (d) Flow cytometric analysis of Foxp3 expression in naive CD4<sup>+</sup> T cells (CD4<sup>+</sup>CD44<sup>lo</sup>CD62L<sup>hi</sup>) from *Senp3<sup>+/+</sup>Cd4-Cre* and *Senp3<sup>fl/fl</sup>Cd4-Cre* mice stimulated with anti-CD3 plus anti-CD28 antibodies and various concentrations (above plots) of TGF- $\beta$ . Numbers above bracketed lines indicate percent Foxp3<sup>+</sup> cells. Data are representative of at least three independent experiments. Error bars are the mean  $\pm$  SEM values. Two-tailed unpaired Student's *t* tests were performed. ns, not statistically significant.

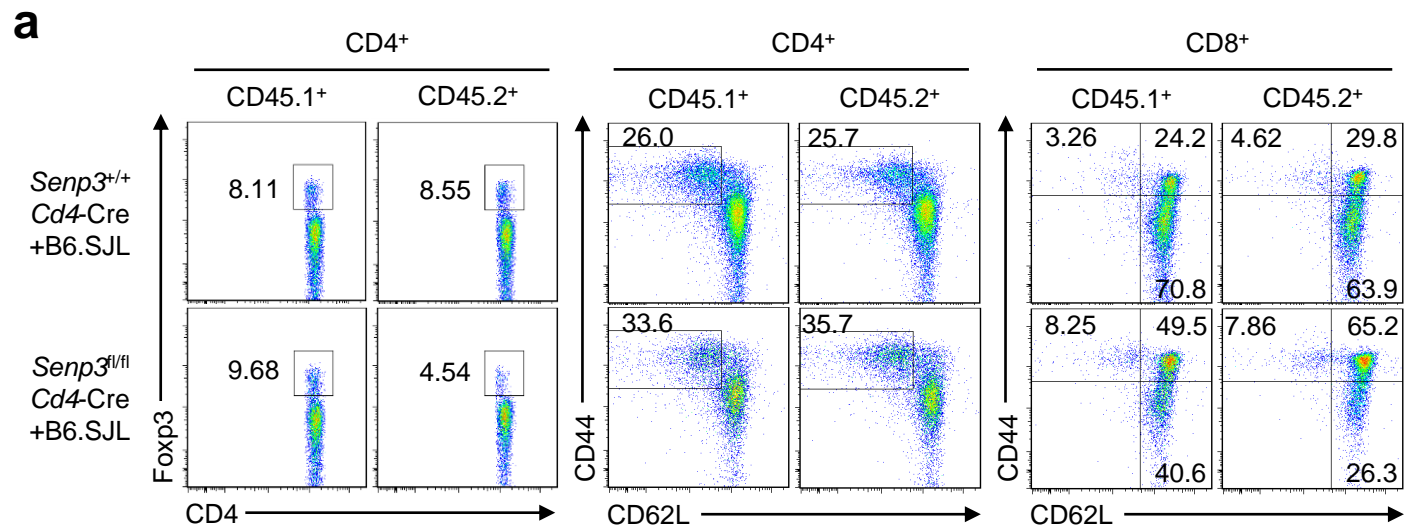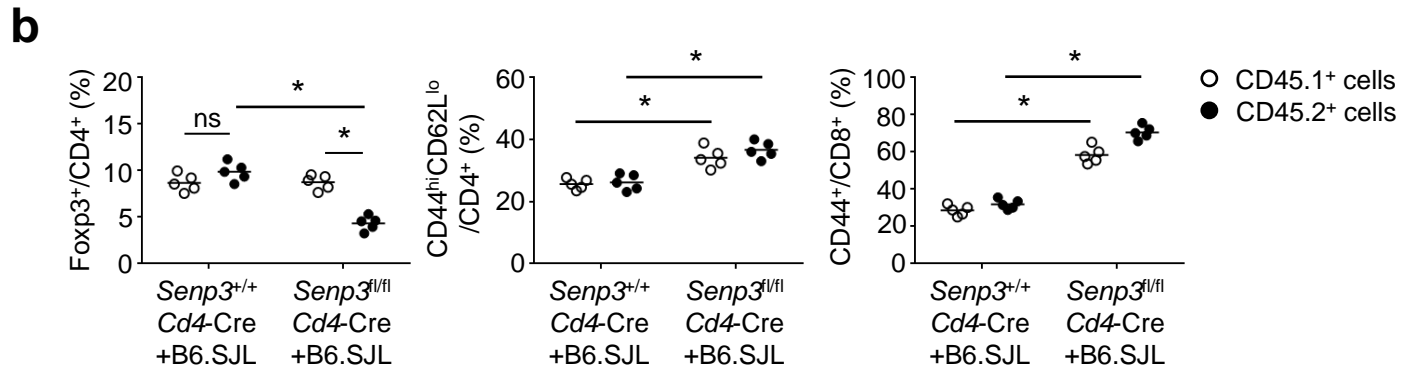

**Supplementary Figure 4. Cell-intrinsic defect of SENP3-deficient Treg cell generation and function.**

(a, b) Flow cytometric analysis of splenocytes in *Rag1*<sup>-/-</sup> recipient mice adoptively transferred (for 8 weeks) with bone marrow (BM) cells derived from *Senp3*<sup>+/+</sup>*Cd4-Cre* and *Senp3*<sup>fl/fl</sup>*Cd4-Cre* mice (CD45.2<sup>+</sup>) along with BM cells derived from B6.SJL mice (CD45.1<sup>+</sup>), gating on CD45.1<sup>+</sup> or CD45.2<sup>+</sup> cells. Data are presented as representative plots (a) and summary graphs (b). Error bars are the mean  $\pm$  SEM values. n = 5. Two-tailed unpaired Student's *t* tests were performed. ns, not statistically significant. \*, P < 0.05.

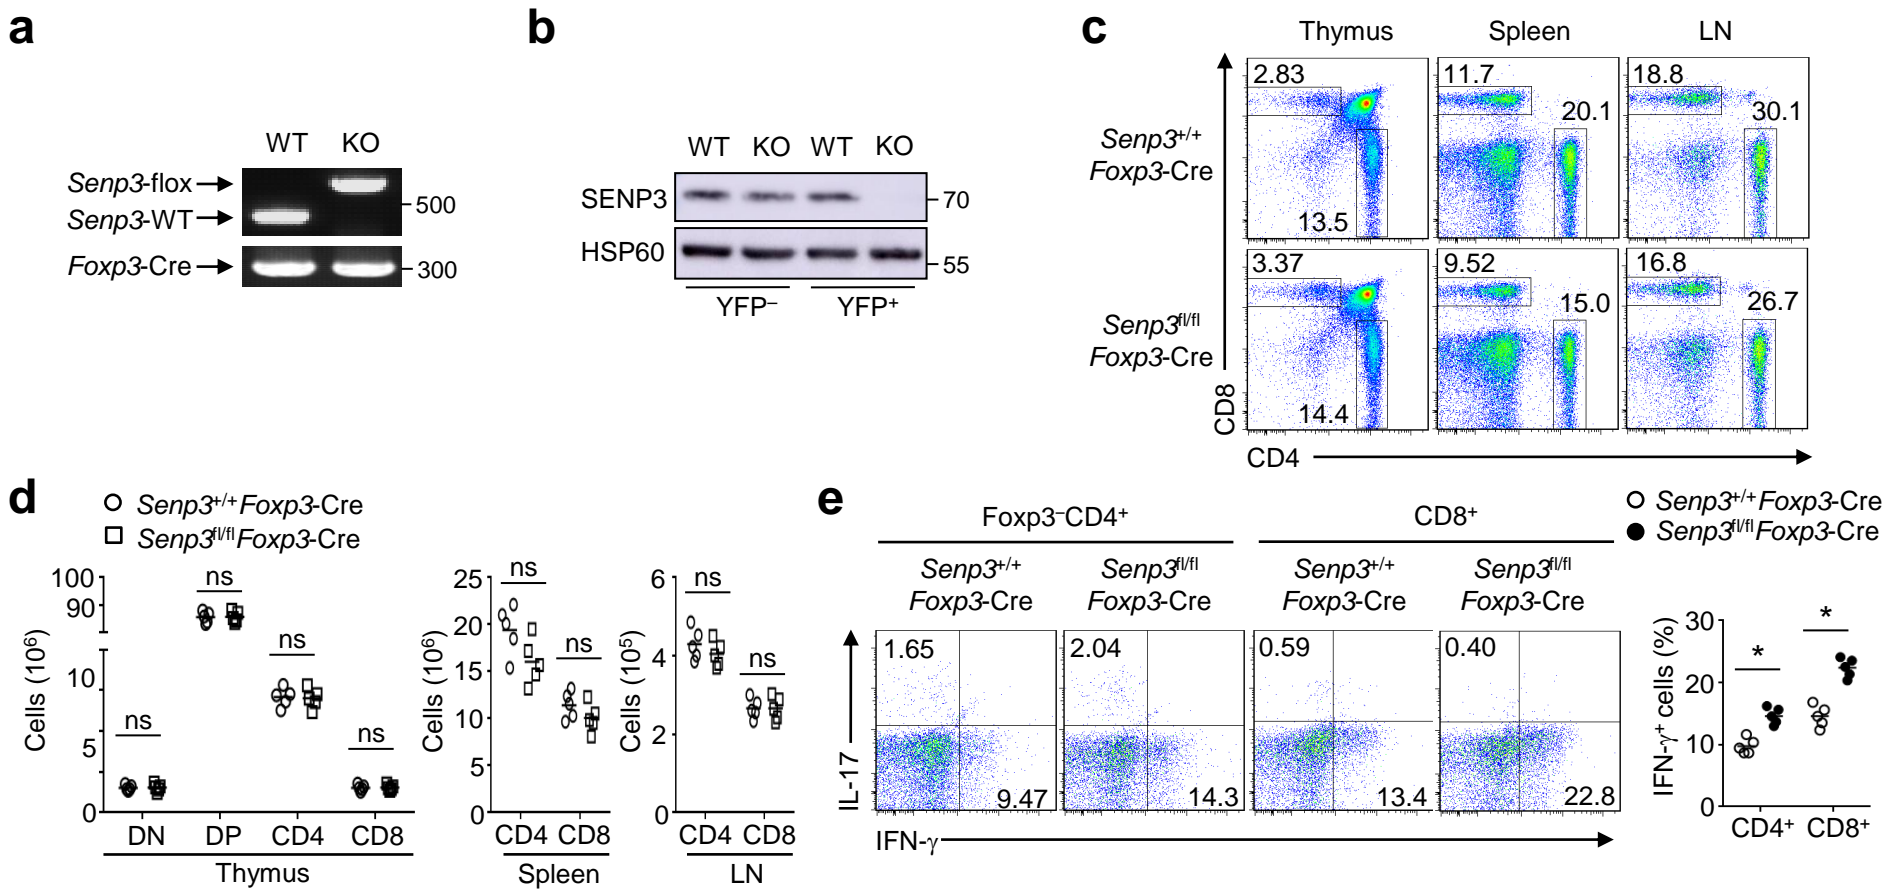

**Supplementary Figure 5. Thymocyte development and peripheral T cell frequency in the *Senp3*<sup>fl/fl</sup> *Cd4*-Cre mice. (a)** Genotyping PCR to amplify the *Senp3*-flox and WT alleles (top) or the Cre cDNA (bottom). **(b)** Immunoblot analysis of SENP3, showing Treg cell-specific SENP3 ablation (WT: *Senp3*<sup>+/+</sup> *Foxp3*-Cre; KO: *Senp3*<sup>fl/fl</sup> *Foxp3*-Cre). **(c)** Flow cytometric analysis of the percentage of CD4<sup>+</sup> and CD8<sup>+</sup> T cells from the thymus, spleen and lymph nodes (LN) of 6-week-old wild-type and *Senp3*<sup>fl/fl</sup> *Foxp3*-Cre mice. **(d)** Cell number of CD4<sup>-</sup>CD8<sup>-</sup> (DN), CD4<sup>+</sup>CD8<sup>+</sup> (DP), CD4<sup>+</sup>CD8<sup>-</sup> (CD4), CD4<sup>-</sup>CD8<sup>+</sup> (CD8) in the thymus, and CD4<sup>+</sup> and CD8<sup>+</sup> T cells in the spleen and LN of 6-week-old wild-type and *Senp3*<sup>fl/fl</sup> *Foxp3*-Cre mice. **(e)** Flow cytometric analysis of the percentage of IFN-γ-producing T cells in total splenocytes from 8-month-old wild-type and *Senp3*<sup>fl/fl</sup> *Foxp3*-Cre mice. Data are representative of at least three independent experiments. Error bars are the mean ± SEM values. n = 5. Two-tailed unpaired Student's *t* tests were performed. ns, not statistically significant. \*, P < 0.05.

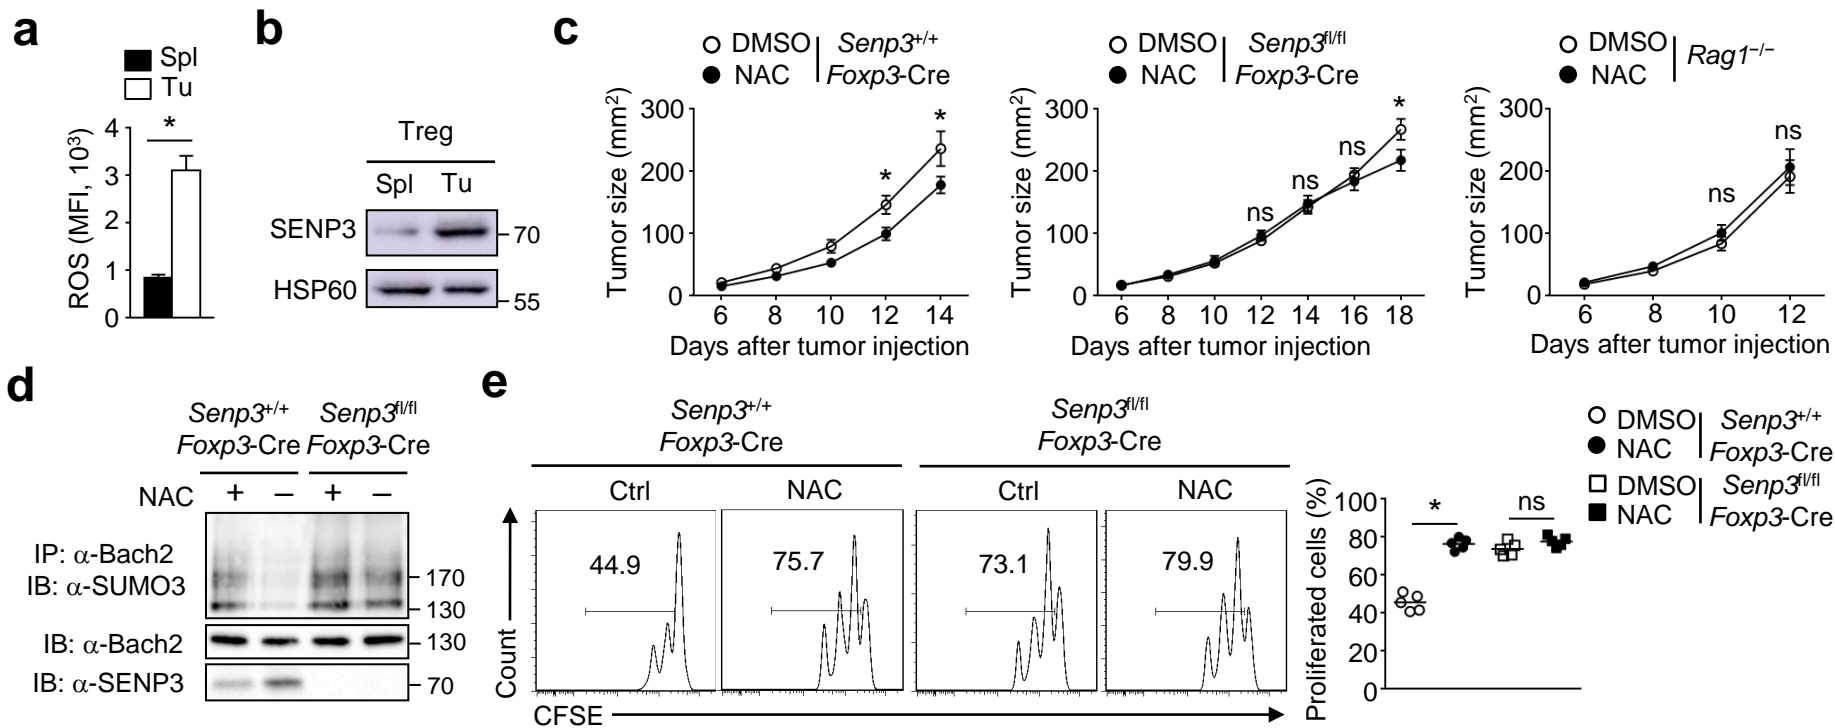

**Supplementary Figure 6. NAC treatment promotes antitumor immunity and perturbs Treg cell function.** (a, b) Levels of ROS (a) and SENP3 (b) in Treg cells from the spleen (Spl) and tumor (Tu) of tumor-bearing wild-type mice (MFI: mean fluorescence intensity). (c) Growth curve of tumors in 6-week-old *Senp3<sup>+/+</sup> Foxp3-Cre*, *Senp3<sup>fl/fl</sup> Foxp3-Cre* mice or *Rag1<sup>-/-</sup>* mice receiving daily NAC (n = 8 mice per group). (d) SUMOylation assays using tumor-infiltrating Treg cells from c (on day 14). (e) CFSE-labelled OT-I T cells were co-cultured with OVA peptide (257-264) and splenocytes from wild-type mice for 24 hours in the presence of tumor-infiltrating Treg cells from c (on day 14) at a ratio of 3:1 (OT-I/Treg cells). Data are representative of at least three independent experiments. Error bars are the mean  $\pm$  SEM values. n = 5. Two-tailed unpaired Student's *t* tests were performed. ns, not statistically significant. \*,  $P < 0.05$ .

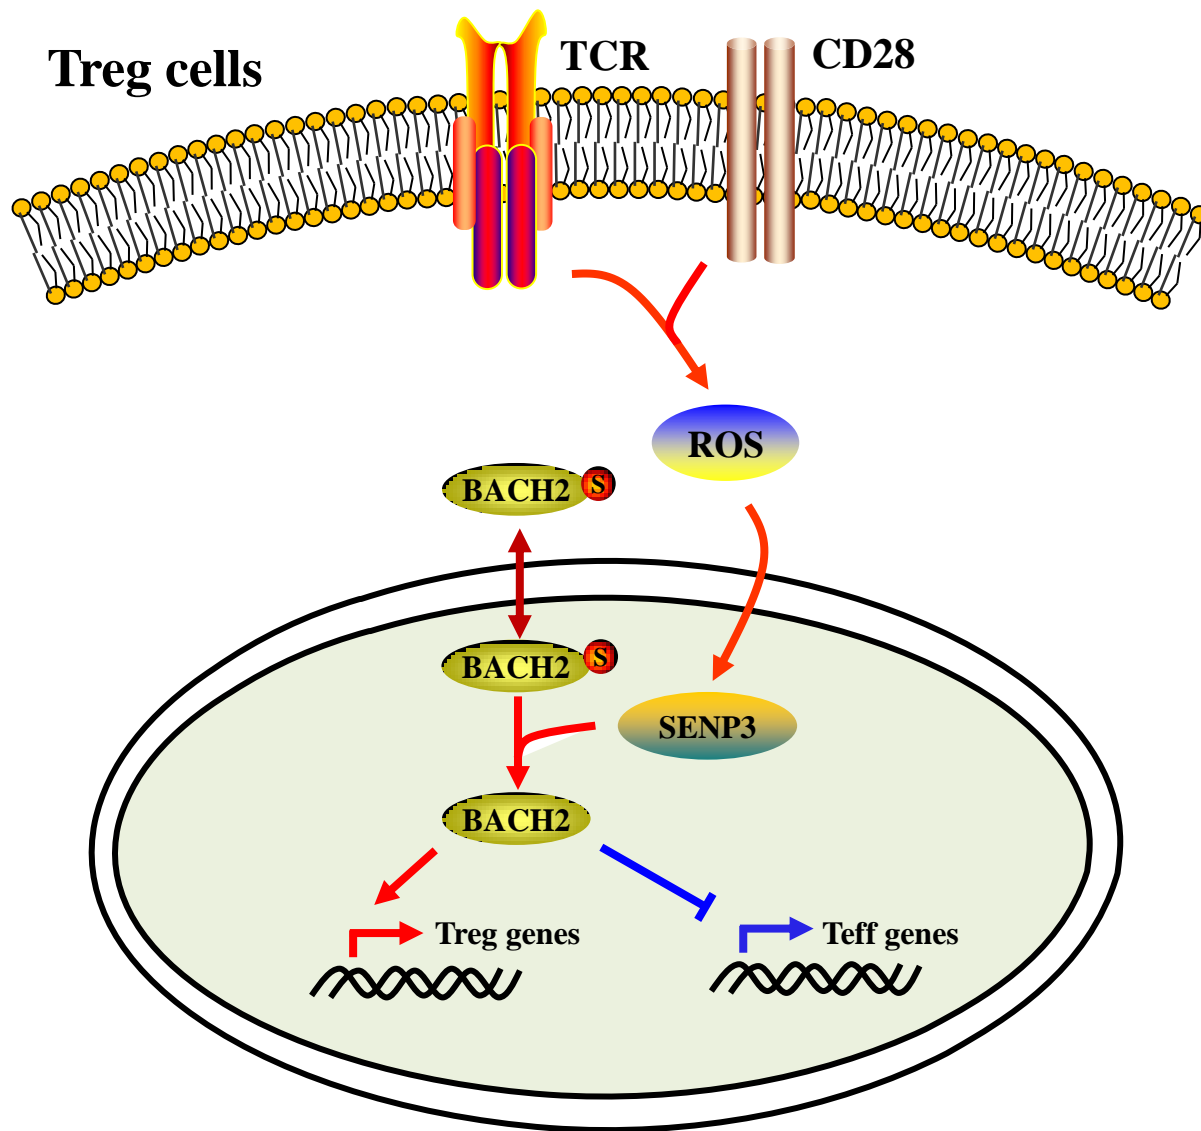

**Supplementary Figure 7. SENP3 maintains the stability and function of regulatory T cells via BACH2 deSUMOylation.** SENP3 is rapidly stabilized by TCR- and CD28-stimulated reactive oxygen species (ROS) in Treg cells. SENP3 accumulation triggered by ROS mediates BACH2 deSUMOylation to prevent its nuclear export, thereby repressing the genes associated with CD4<sup>+</sup> T effector cell differentiation and stabilizing Treg cell-specific gene signatures.



Fig. 5a

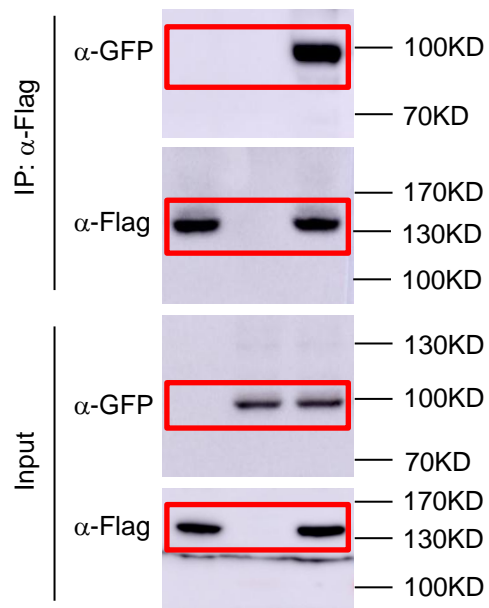

Fig. 5b

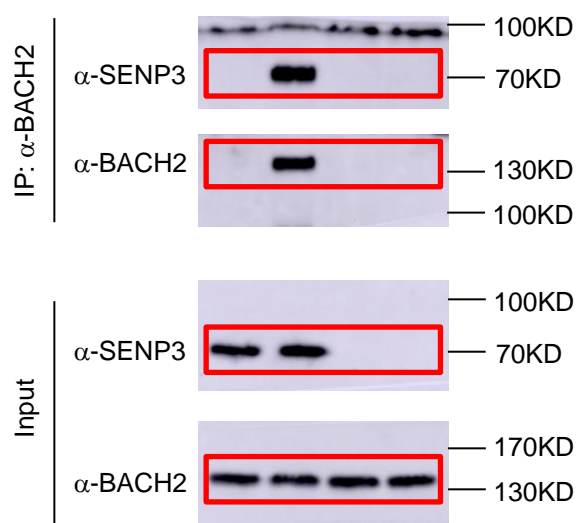

Fig. 5d

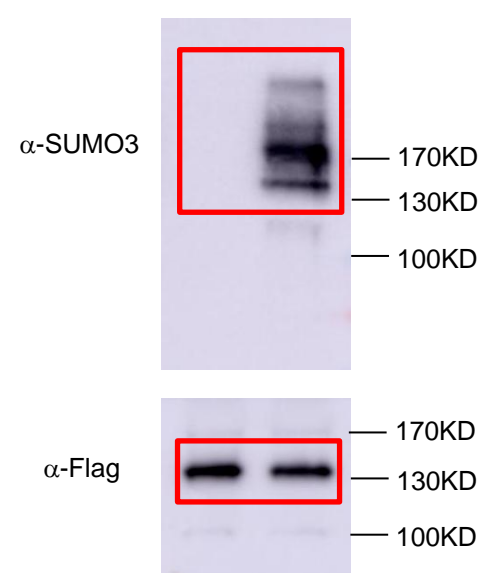

Fig. 5e

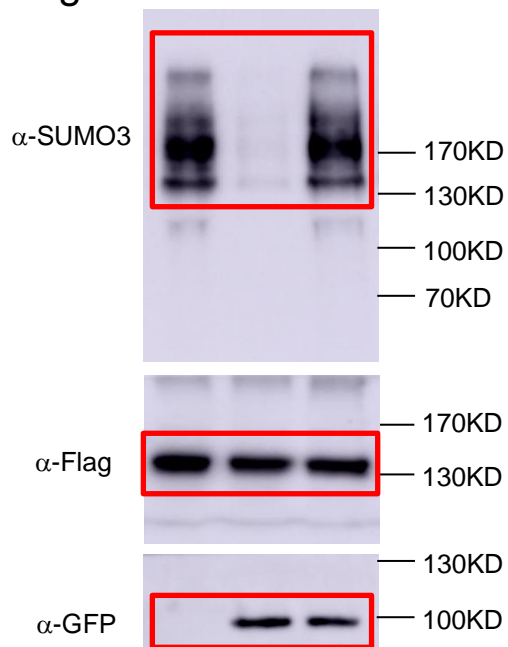

Fig. 5f

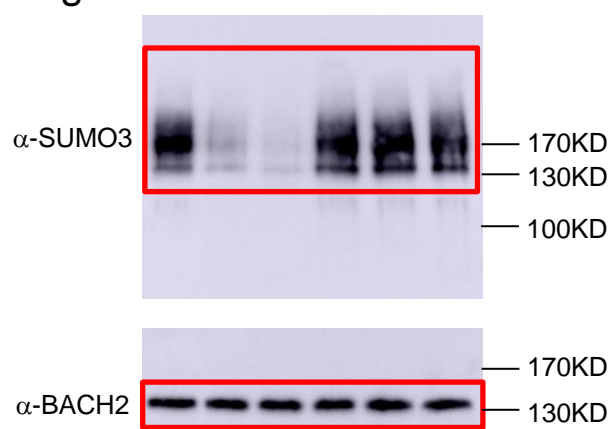

Fig. 5g

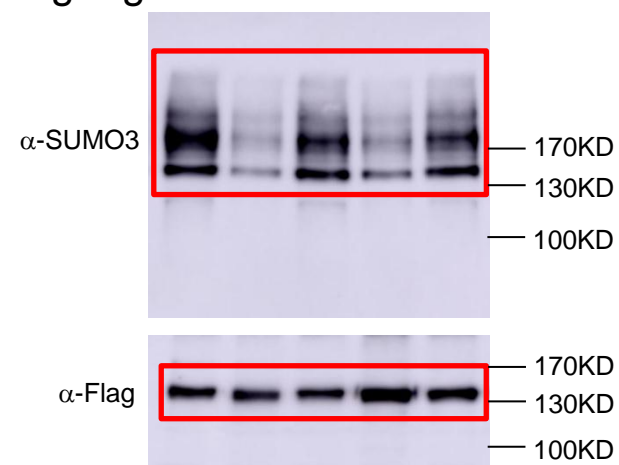

**Fig. 5i**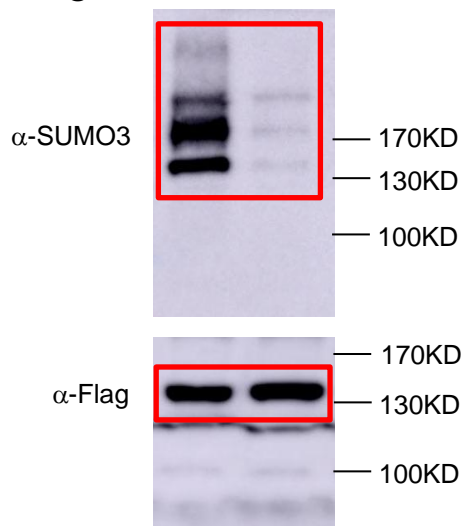**Fig. 6a**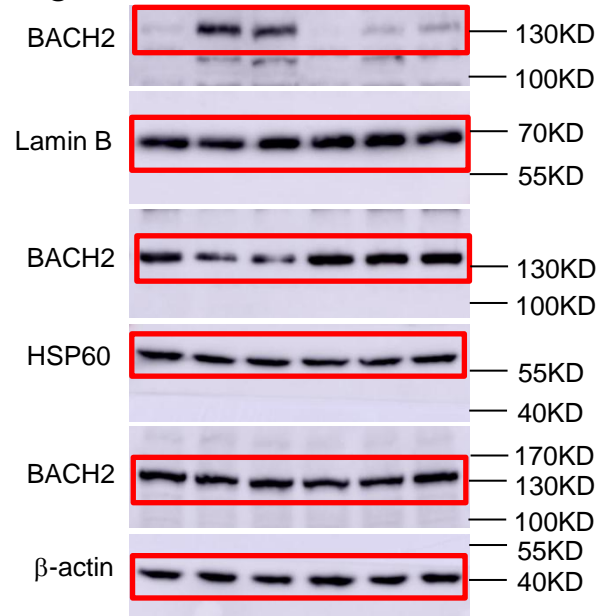**Fig. 6b**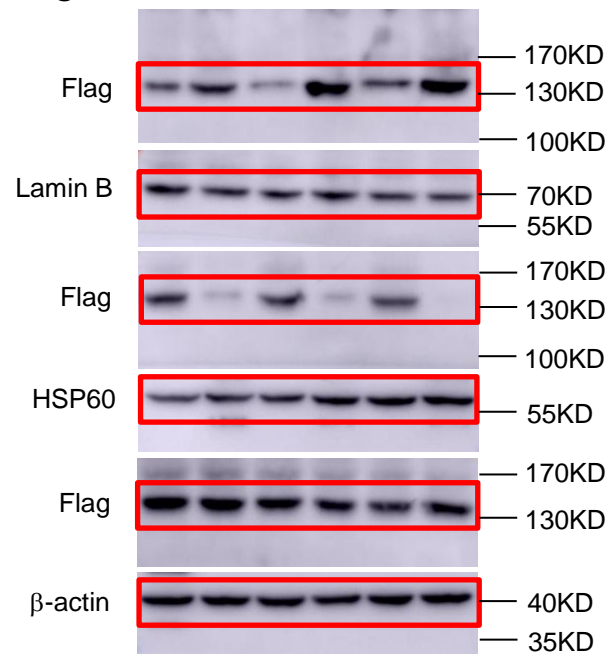**Fig. 6c**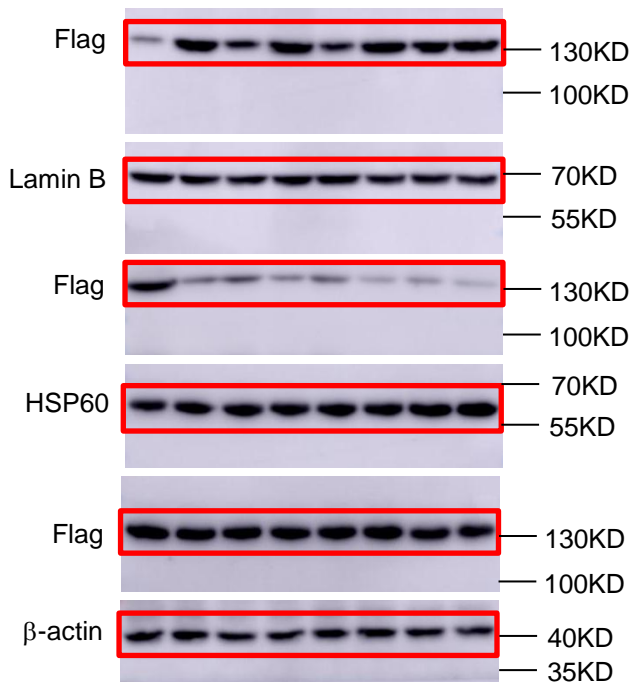**Fig. 6d**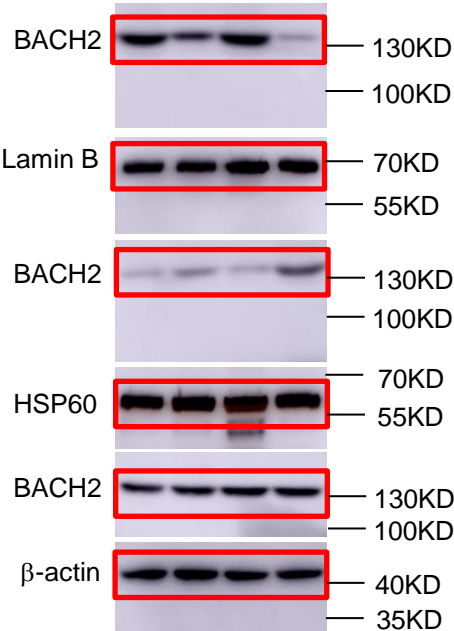**Fig. 7b**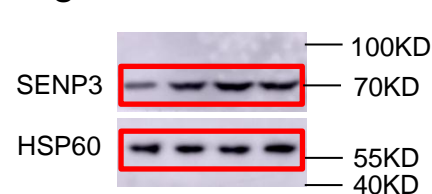**Fig. 7c**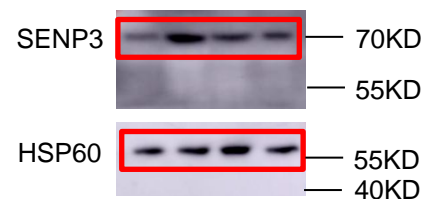**Fig. 7e**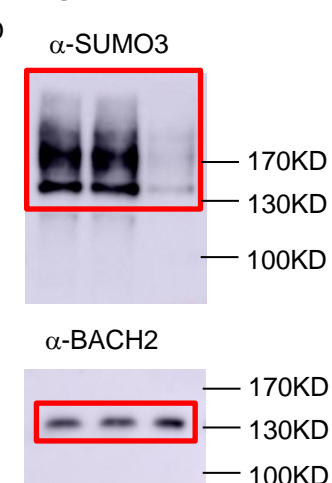**Supplementary Figure 8. All the uncropped scans of the western blots.**

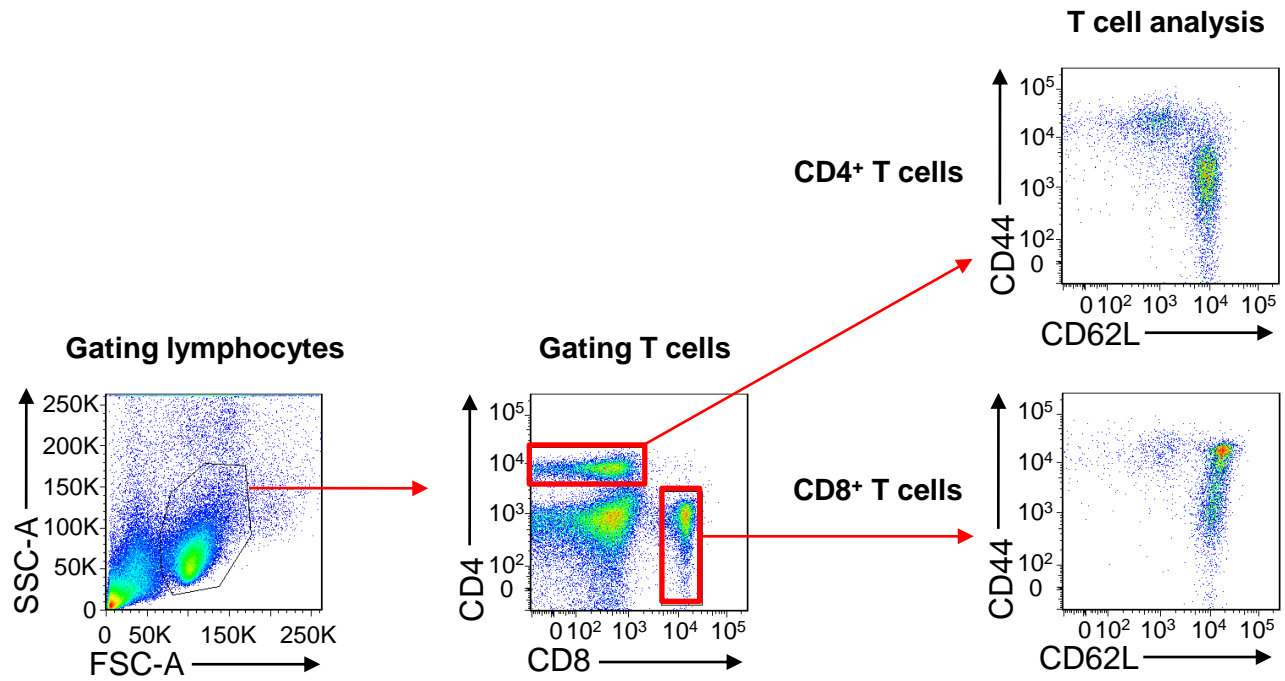

Supplementary Figure 9. All the FACS gating strategies.

**Supplementary Table 1. Gene-specific primers used for qPCR.**

| Gene         | Forward primers (5'->3') | Reverse primers (5'->3') |
|--------------|--------------------------|--------------------------|
| <i>Ifng</i>  | CAGCAACAGCAAGGCGAAA      | CTGGACCTGTGGGTTGTTGAC    |
| <i>Il13</i>  | CACACAAGACCAGACTCCCC     | TCTGGGTCCTGTAGATGGCA     |
| <i>Il4</i>   | CGCCATGCACGGAGATG        | CGAGCTCACTCTCTGTGGTGTT   |
| <i>Il21</i>  | AGGACCCTTGTCTGTCTGGT     | GCTCACAGTGCCCCTTTACA     |
| <i>Il17a</i> | AGCAGCGATCATCCCTCAA      | CTTCATTGCGGTGGAGAGTCC    |
| <i>Foxp3</i> | ACTGGGGTCTTCTCCCTCAA     | CGTGGGAAGGTGCAGAGTAG     |
| <i>Gpr83</i> | CGCCCTTCACTTTGGTCATC     | AGCGCACAATGTCCTCACTG     |
| <i>Gbp5</i>  | TTGTTTTTGACGCTCCTGCG     | GGCTTTCTAGACGAGGTCCG     |
| <i>Actin</i> | CGTGAAAAGATGACCCAGATCA   | CACAGCCTGGATGGCTACGT     |

## Supplementary Table 2. PCR primers used in ChIP-PCR.

| Gene         | Forward primers        | Reverse primers        |
|--------------|------------------------|------------------------|
| <i>I14</i>   | GAAGCAGGGATGGTCAGACT   | TCCCCTAGCTATCCCCTAGC   |
| <i>I15</i>   | GCTTCCCTCCCTTTCCAG     | CCGACTTGGGGGTGAGTT     |
| <i>Ccr4</i>  | ATGTGGGGCTTCTTGACAAA   | TCCCTGCCACAGAAGAACT    |
| <i>Gapdh</i> | CTACCCAAAAGGGACACCTACA | CATGACAACCTTTGGCATTGTG |
